# Supplementary material
Source: Springer Nature journal article supplement (https://www.springerprofessional.de/resource/supplementary/13638_2011_473_MOESM7_ESM.pdf/11897796)

Sub-channel allocation has been determined

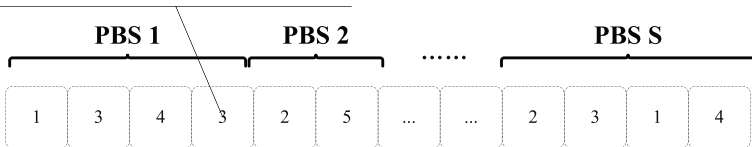

In particle structure, each element represents a power value, For example, the fourth sub-channel is preallocated to power 0.011 watt

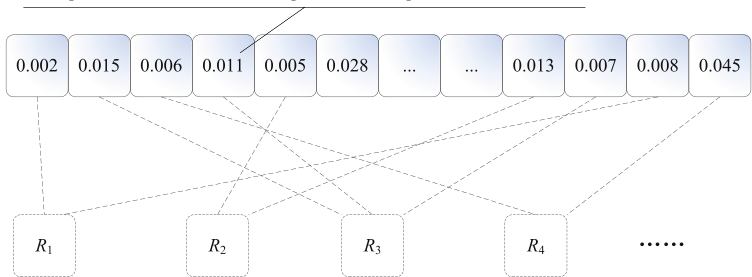

Supplement: MOESM7 [file 11897796]
